Table S1. Comparison of known  $\text{NH}_4^+$  concentrations ( $[\text{NH}_4^+]_{\text{known}}$ ) and measured  $\text{NH}_4^+$  concentrations after correction for interference by  $\text{K}^+$  ( $[\text{NH}_4^+]_{\text{corrected}}$ ) in solutions containing 25, 100, 120 and 140  $\text{mmol l}^{-1} \text{K}^+$ . The sum of  $\text{KCl}$ ,  $\text{NH}_4\text{Cl}$  and  $\text{NaCl}$  was 85  $\text{mmol l}^{-1}$  for solutions containing 25  $\text{mmol l}^{-1} \text{K}^+$  and 170  $\text{mmol l}^{-1}$  for solutions containing 100, 120 and 140  $\text{mmol l}^{-1} \text{K}^+$ .

|                                      |          | $[\text{NH}_4^+]_{\text{known}} (\text{mmol l}^{-1})$ |     |     |     |     |      |      |      |      |  |
|--------------------------------------|----------|-------------------------------------------------------|-----|-----|-----|-----|------|------|------|------|--|
| 25 $\text{mmol l}^{-1} \text{K}^+$   |          | 0                                                     | 0.1 | 0.5 | 1   | 5   | 10   | 20   |      |      |  |
| $[\text{NH}_4^+]_{\text{corrected}}$ | Mean     | 0.0                                                   | 0.1 | 0.4 | 1.1 | 5.2 | 10.0 | 20.1 |      |      |  |
|                                      | s.e.m.   | 0.1                                                   | 0.1 | 0.1 | 0.1 | 0.1 | 0.3  | 0.3  |      |      |  |
|                                      | <i>N</i> | 6                                                     | 6   | 6   | 6   | 6   | 6    | 6    |      |      |  |
|                                      |          | $[\text{NH}_4^+]_{\text{known}} (\text{mmol l}^{-1})$ |     |     |     |     |      |      |      |      |  |
| 100 $\text{mmol l}^{-1} \text{K}^+$  |          | 0                                                     | 0.1 | 0.5 | 1   | 5   |      |      |      |      |  |
| $[\text{NH}_4^+]_{\text{corrected}}$ | Mean     | 0.3                                                   | 0.4 | 0.8 | 1.3 | 5.4 |      |      |      |      |  |
|                                      | s.e.m.   | 0.1                                                   | 0.1 | 0.1 | 0.1 | 0.1 |      |      |      |      |  |
|                                      | <i>N</i> | 7                                                     | 7   | 7   | 7   | 7   |      |      |      |      |  |
|                                      |          | $[\text{NH}_4^+]_{\text{known}} (\text{mmol l}^{-1})$ |     |     |     |     |      |      |      |      |  |
| 120 $\text{mmol l}^{-1} \text{K}^+$  |          | 0                                                     | 0.1 | 0.5 | 1   | 5   | 10   | 20   | 30   | 40   |  |
| $[\text{NH}_4^+]_{\text{corrected}}$ | Mean     | 0.1                                                   | 0.3 | 0.5 | 1.1 | 5.1 | 9.7  | 20.0 | 30.5 | 40.2 |  |
|                                      | s.e.m.   | 0.1                                                   | 0.1 | 0.1 | 0.1 | 0.2 | 0.3  | 0.4  | 0.6  | 1.0  |  |
|                                      | <i>N</i> | 12                                                    | 12  | 12  | 12  | 12  | 5    | 5    | 5    | 5    |  |
|                                      |          | $[\text{NH}_4^+]_{\text{known}} (\text{mmol l}^{-1})$ |     |     |     |     |      |      |      |      |  |
| 140 $\text{mmol l}^{-1} \text{K}^+$  |          | 0                                                     | 0.1 | 0.5 | 1   | 5   |      |      |      |      |  |
| $[\text{NH}_4^+]_{\text{corrected}}$ | Mean     | 0.2                                                   | 0.1 | 0.8 | 1.2 | 5.0 |      |      |      |      |  |
|                                      | s.e.m.   | 0.1                                                   | 0.2 | 0.2 | 0.1 | 0.1 |      |      |      |      |  |
|                                      | <i>N</i> | 7                                                     | 7   | 7   | 7   | 7   |      |      |      |      |  |
